# Supplementary material for: Upconversion core/shell nanoparticles with lowered surface quenching for fluorescence detection of Hg2+ ions
Source: Royal Society of Chemistry journal article supplement (doi:10.1039/c8dt02853b), 2018-01-01
Supplement: c8dt02853b1.pdf [file c8dt02853b1.pdf]

# Supplementary Information

## Upconversion core/shell nanoparticles with lowered surface quenching for fluorescence detection of Hg<sup>2+</sup> ion

Lichun Shi,<sup>a,\*</sup> Junshan Hu,<sup>\*,c</sup> Xiaofeng Wu,<sup>\*,b2</sup> Shiping Zhan,<sup>b1</sup> Shigang Hu,<sup>b2</sup> Zhijun Tang,<sup>b2</sup> Mingshu Chen,<sup>a</sup> Yunxin Liu<sup>\*,b1</sup>

<sup>a</sup> Key Laboratory of Organic Polymer Photoelectric Materials, School of Science, Xijing University, Xi'an, 710123 China.

<sup>b1</sup> Department of Physics and Electronic Science, <sup>b2</sup> Department of Information Science, Hunan University of Science and Technology, Xiangtan 411201 China.

<sup>c</sup> School of Physics, University of Electronic Science and Technology of China, Chengdu, 610054 China.

\* This corresponding should be addressed to [lyunxin@163.com](mailto:lyunxin@163.com)(Y Liu), and [hujunshan1224@163.com](mailto:hujunshan1224@163.com)( J Hu) and [xfwuvip@126.com](mailto:xfwuvip@126.com)(X Wu).

## I. Quantum yield

For calculating the quantum yield, the fluorescent spectra of core and core/shell UCNPs with the same amount of nanoparticles were measured and shown in **Fig. S1**.

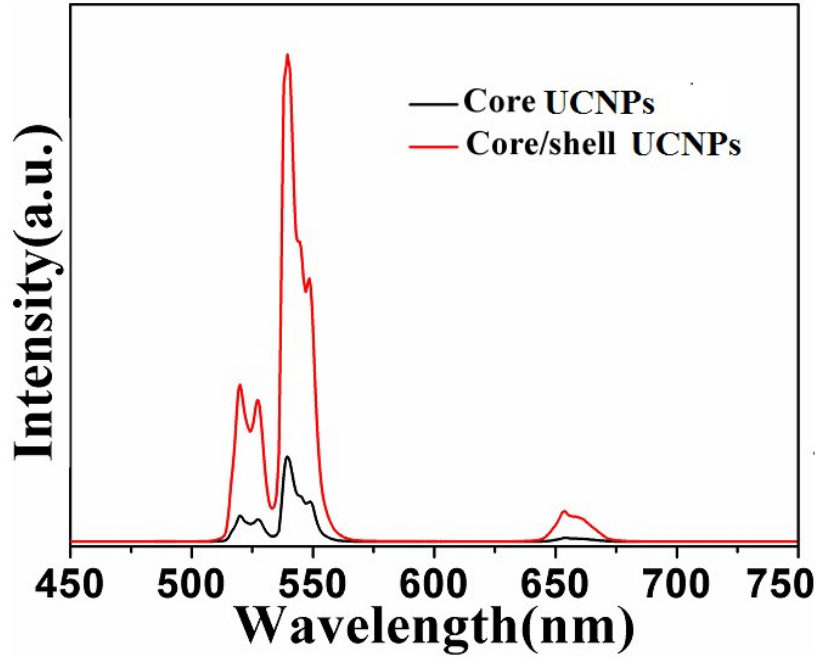

**Fig. S1** Fluorescent spectra of core and core/shell UCNPs with the same amount of nanoparticles.

Based on the following Equation (1), the upconversion quantum yields (QY) for red and green emission are calculated and listed in **Table S1**.

**Table S1.** The quantum efficiency of the samples.

| Sample                                                                    | QY<br>(green emission) | QY<br>(red emission) |
|---------------------------------------------------------------------------|------------------------|----------------------|
| NaGdF <sub>4</sub> :Yb <sup>3+</sup> ,Er <sup>3+</sup>                    | 0.152%                 | 0.016%               |
| NaGdF <sub>4</sub> :Yb <sup>3+</sup> ,Er <sup>3+</sup> @NaYF <sub>4</sub> | 0.833%                 | 0.095%               |

The QY is defined as:

$$QY = \frac{\eta_{UE}}{\sum E_{\lambda} \times V_{IRST}} \quad (1)$$

where QY is the quantum yield, the energetic upconversion efficiency  $\eta_{UE}$  of NaGdF<sub>4</sub>:Yb<sup>3+</sup>,Er<sup>3+</sup>@NaYF<sub>4</sub> core/shell nanoparticles is approximately calculated to be

0.833% according to QY of 0.3% from Frank C. J. M. van Veggel,s reporter in [Nanoscale, 2010, 2, 1417–1419] due to a fact that the upconversion efficiency of  $\text{NaGdF}_4:\text{Yb}^{3+},\text{Er}^{3+}$  nanoparticles is close to that of  $\text{NaYF}_4:\text{Yb}^{3+},\text{Er}^{3+}$ .  $E_\lambda$  is the energy of defined wavelength,  $V_{IRST}$  is the Intensity Ratio of Single emission band to Total emissions.

## II. FRET efficiency

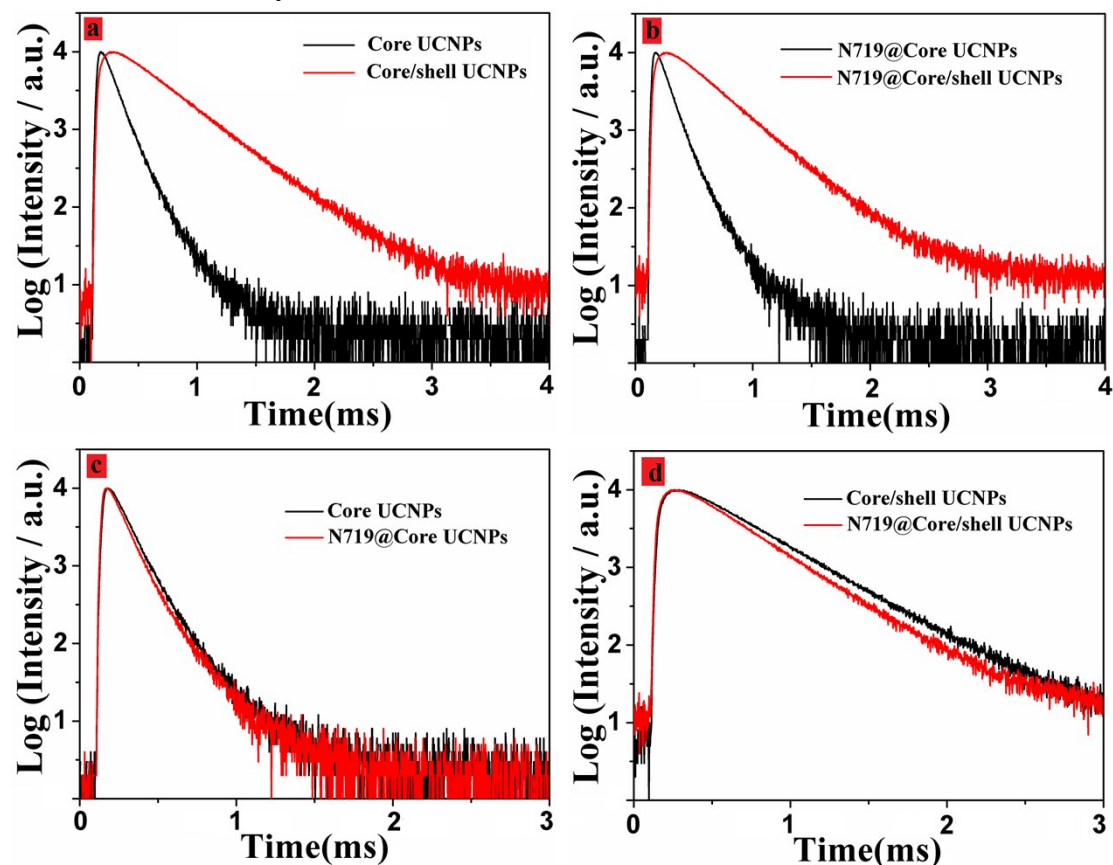

**Fig. S2** Fluorescence decay of 540 nm green emission of core UCNP, core UCNP@N719, Core/shell UCNP and core/shell UCNP@ N719.

The decay time of UCNP has been measured before and after it reacts with N719 and is presented in **Fig. S2**. The lifetime of 540 nm green emission of core UCNP and N719@core UCNP is addressed to be 0.134 ms and 0.12 ms, respectively, according to the decay curves, while those of core/shell UCNP and N719@core/shell UCNP are addressed to be 0.484 ms and 0.41 ms, respectively. The FRET efficiency can be calculated by the following equation [J. Phys. Chem. B 2006, 110, 26068-26074]:

$$E = 1 - \quad (2)$$

where  $\tau_{da}$  and  $\tau_d$  are the fluorescence lifetimes of a donor in the presence and absence of an acceptor. The calculated FRET efficiency of N719@core UCNPs ( $\tau_{da}=0.12$  ms,  $\tau_d=0.134$  ms) and N719@core/shell UCNPs ( $\tau_{da}=0.41$  ms,  $\tau_d=0.484$  ms) is equal to 10.4% and 15.3%, respectively, according to the fluorescence lifetimes.
